# Supplementary material for: Antibacterial and Antibiofilm Potential of Ethanolic Extracts of Duguetia vallicola (Annonaceae) against in-Hospital Isolates of Pseudomonas aeruginosa
Source: MDPI journal article supplement (doi:10.3390/plants13101412), 2024-05-18
Supplement: s1 [file s1]

## Article

# Antibacterial and antibiofilm potential of ethanolic extracts of *Duguetia vallicola* (Annonaceae) against in-hospital isolates of *Pseudomonas aeruginosa*

Orfa Inés Contreras-Martínez<sup>1</sup>, Daniela Sierra-Quiroz<sup>1</sup> and Alberto Angulo-Ortíz<sup>2\*</sup>

<sup>1</sup> Biology Department, Faculty of Basic Sciences, University of Córdoba, Montería 230002, Colombia

<sup>2</sup> Chemistry Department, Faculty of Basic Sciences, University of Córdoba, Montería 230002, Colombia

\* Correspondence: aaangulo@correo.unicordoba.edu.co

## Supplementary Materials

**Table S1.** NMR Spectroscopic Data (<sup>1</sup>H 400 MHz, <sup>13</sup>C 100 MHz) of **1** in CDCl<sub>3</sub>

| ATOM | <sup>1</sup> H (ppm) | MULT | J (Hz)    | <sup>13</sup> C (ppm) | DEPT            | HMQC | HMBC       |
|------|----------------------|------|-----------|-----------------------|-----------------|------|------------|
| 1    |                      |      |           | 147.9                 | C               |      | 7.15, 6.36 |
| 1a   |                      |      |           | 130.2                 | C               |      |            |
| 1b   |                      |      |           | 123.2                 | C               |      |            |
| 2    |                      |      |           | 151.7                 | C               |      | 7.15, 6.36 |
| 3    | 7.15                 | s    |           | 103.2                 | CH              | 7.15 | 7.74       |
| 3a   |                      |      |           | 135.7                 | C               |      | 8.88       |
| 4    | 7.74                 | d    | 5.0       | 124.2                 | CH              | 7.74 | 8.88       |
| 5    | 8.88                 | d    | 5.1       | 144.8                 | CH              | 8.88 |            |
| 6a   |                      |      |           | 145.2                 | C               |      | 8.88       |
| 7    |                      |      |           | 182.3                 | C               |      | 8.56       |
| 7a   |                      |      |           | 131.2                 | C               |      | 7.55       |
| 8    | 8.56                 | dd   | 7.9 – 0.7 | 128.8                 | CH              | 8.56 | 7.71       |
| 9    | 7.55                 | pst  | 7.7 – 7.4 | 128.5                 | CH              | 7.55 | 8.59       |
| 10   | 7.71                 | dt   | 8.2 – 1.2 | 133.9                 | CH              | 7.71 |            |
| 11   | 8.59                 | d    | 8.1       | 127.3                 | CH              | 8.59 | 7.55       |
| 11a  |                      |      |           | 132.8                 | C               |      | 8.59, 7.71 |
| 12   | 6.36                 | s    |           | 102.4                 | CH <sub>2</sub> | 6.36 | 6.36       |

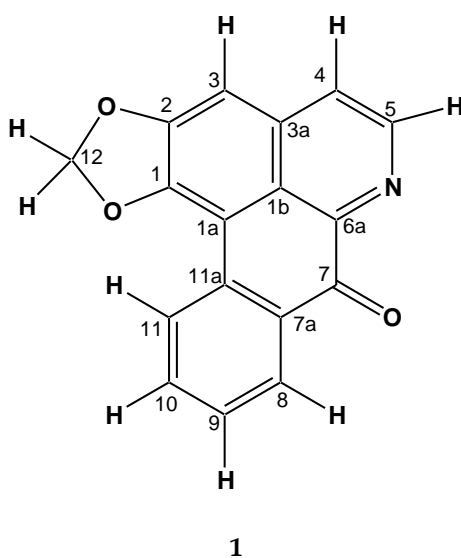**Table S2.** NMR Spectroscopic Data ( $^1\text{H}$  400 MHz,  $^{13}\text{C}$  100 MHz) of **2** in  $\text{CDCl}_3$ 

| ATOM | $^1\text{H}$ (ppm) | MULT | $J$ (Hz)  | $^{13}\text{C}$ (ppm)* | HMQC | HMBC       |
|------|--------------------|------|-----------|------------------------|------|------------|
| 1    |                    |      |           | 156.4                  |      | 4.08       |
| 1a   |                    |      |           | 115.8                  |      | 9.11       |
| 1b   |                    |      |           | 122.8                  |      | 8.22       |
| 2    |                    |      |           | 147.2                  |      | 4.10       |
| 3    |                    |      |           | 148.4                  |      | 8.22, 4.19 |
| 3a   |                    |      |           | 130.8                  |      | 8.97       |
| 4    | 8.22               | d    | 5.3       | 119.1                  | 8.22 | 8.97       |
| 5    | 8.97               | d    | 5.3       | 144.6                  | 8.97 |            |
| 6a   |                    |      |           | 145.6                  |      | 8.97       |
| 7    |                    |      |           | 182.6                  |      | 8.58       |
| 7a   |                    |      |           | 131.1                  |      | 9.11, 7.54 |
| 8    | 8.58               | dd   | 7.8 – 1.4 | 129.0                  | 8.58 | 7.75       |
| 9    | 7.54               | dt   | 7.9 – 1.0 | 128.2                  | 7.54 | 9.11       |
| 10   | 7.75               | dt   | 8.5 – 1.6 | 134.3                  | 7.75 | 8.58, 7.75 |
| 11   | 9.11               | d    | 8.3       | 127.5                  | 9.11 | 7.54       |
| 11a  |                    |      |           | 131.5                  |      | 9.11, 7.54 |
| 12   | 4.08               | s    |           | 61.0                   | 4.08 |            |
| 13   | 4.10               | s    |           | 61.4                   | 4.10 |            |
| 14   | 4.19               | s    |           | 61.7                   | 4.19 |            |

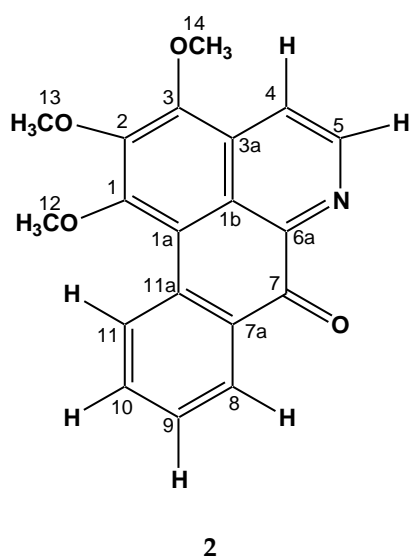**Table S3.** NMR Spectroscopic Data ( $^1\text{H}$  400 MHz,  $^{13}\text{C}$  100 MHz) of **3** in  $\text{CDCl}_3$ 

| ATOM | $^1\text{H}$ (ppm) | MULT           | $J$ (Hz)                 | $^{13}\text{C}$ (ppm) | DEPT          | HMQC         | HMBC             |
|------|--------------------|----------------|--------------------------|-----------------------|---------------|--------------|------------------|
| 1    |                    |                |                          | 145.7                 | C             |              | 6.65, 3.66       |
| 1a   |                    |                |                          | 126.8                 | C             |              | 6.65             |
| 1b   |                    |                |                          | 125.1                 | C             |              | 6.65, 3.12, 3.03 |
| 2    |                    |                |                          | 152.9                 | C             |              | 6.65, 3.89       |
| 3    | 6.65               | s              |                          | 111.6                 | CH            | 6.65         |                  |
| 3a   |                    |                |                          | 127.3                 | C             |              | 3.61             |
| 4    | 2.82<br>3.29       | dd<br>m        | 3.2 – 16.4<br>5.6        | 27.2                  | $\text{CH}_2$ | 2.82<br>3.29 | 6.65, 3.61       |
| 5    | 3.12<br>3.61       | m<br>dd        | 4.2 – 13.8<br>5.9 – 12.1 | 42.1                  | $\text{CH}_2$ | 3.12<br>3.61 |                  |
| 6    | 4.81               | <i>s broad</i> |                          |                       |               |              |                  |
| 6a   | 4.05               | m              |                          | 53.2                  | CH            | 4.05         |                  |
| 7    | 3.03<br>3.12       | pst<br>m       | 13.7<br>4.2 – 13.8       | 35.6                  | $\text{CH}_2$ | 3.03<br>3.12 |                  |
| 7a   |                    |                |                          | 131.7                 | C             |              | 3.12, 3.03       |
| 8    | 7.25               | m              |                          | 127.7                 | CH            | 7.25         | 7.32, 3.12       |
| 9    | 7.25               | m              |                          | 128.0                 | CH            | 7.25         | 7.25             |
| 10   | 7.32               | m              | 8.0 – 2.6                | 127.4                 | CH            | 7.32         |                  |
| 11   | 8.39               | d              | 7.8                      | 128.5                 | CH            | 8.39         | 8.39             |
| 11a  |                    |                |                          | 134.6                 | C             |              | 8.39, 3.12, 3.03 |
| 12   | 3.66               | s              |                          | 60.2                  | $\text{CH}_3$ | 3.66         |                  |
| 13   | 3.89               | s              |                          | 55.9                  | $\text{CH}_3$ | 3.89         |                  |

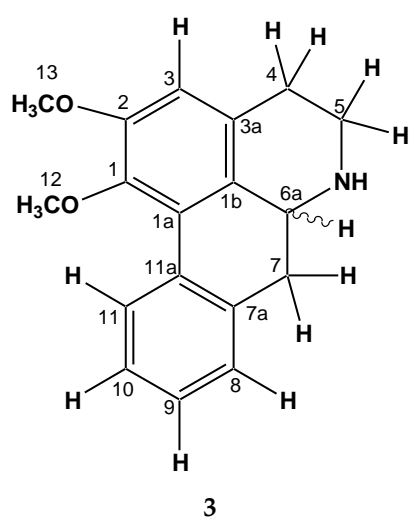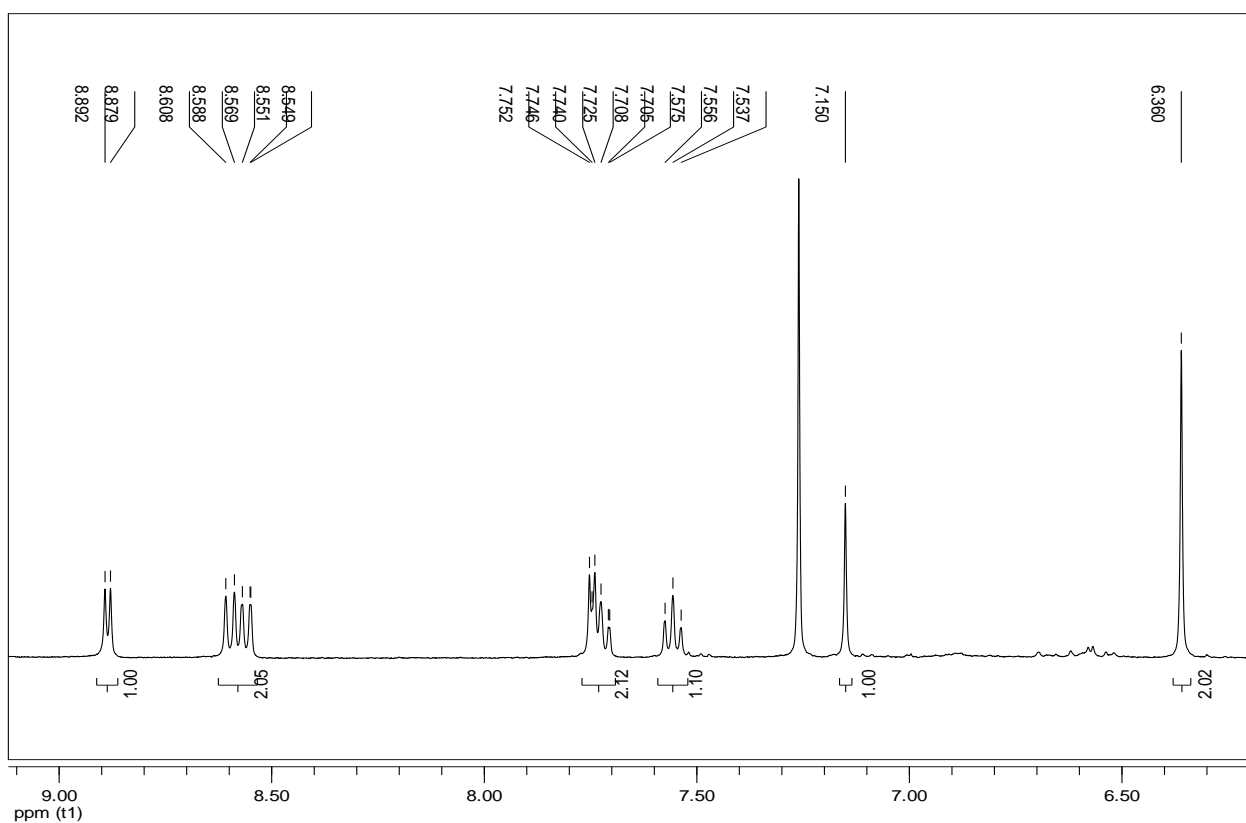

**Figure S1.**  $^1\text{H}$ -NMR spectrum (amplification 6.2 – 9.1 ppm) of **1**, ( $\text{CDCl}_3$ , 400 MHz).

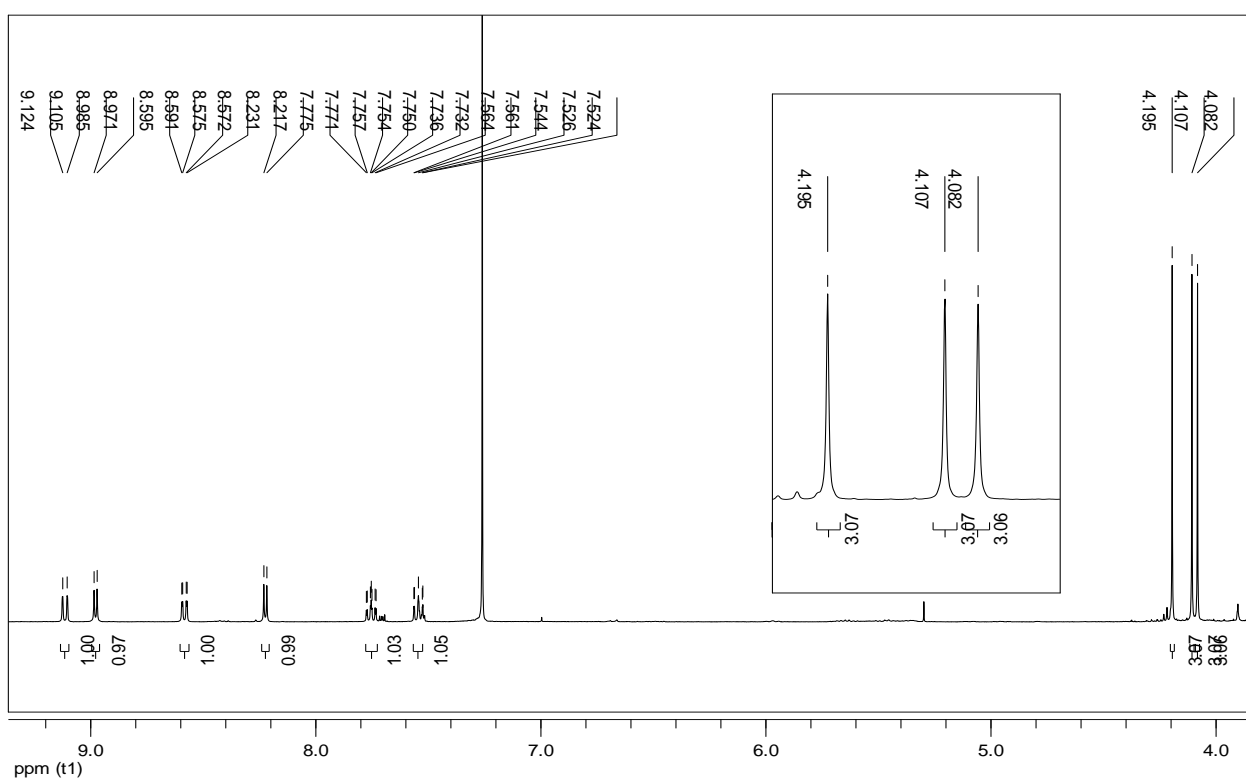

**Figure S2.**  $^1\text{H}$ -NMR spectrum (amplification 4.0 – 9.2 ppm) of **2**, ( $\text{CDCl}_3$ , 400 MHz).

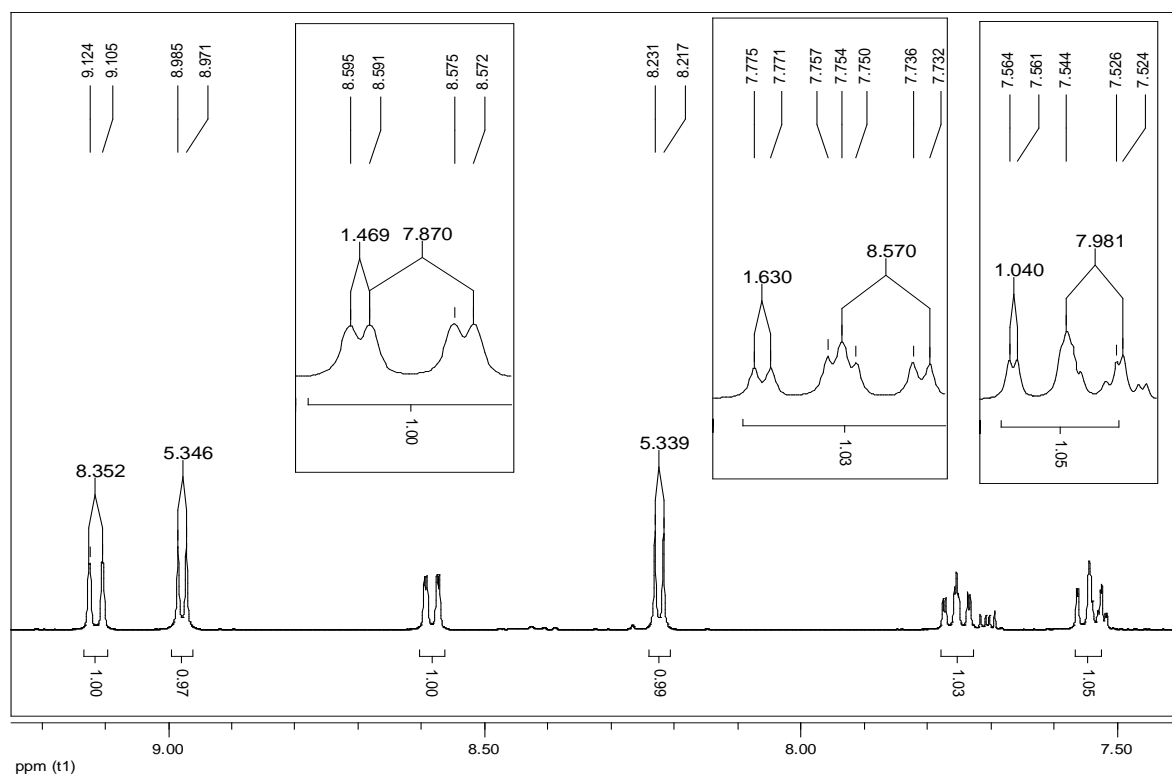

**Figure S3.**  $^1\text{H}$ -NMR spectrum (amplification 7.5 – 9.2 ppm) of **2**, ( $\text{CDCl}_3$ , 400 MHz).

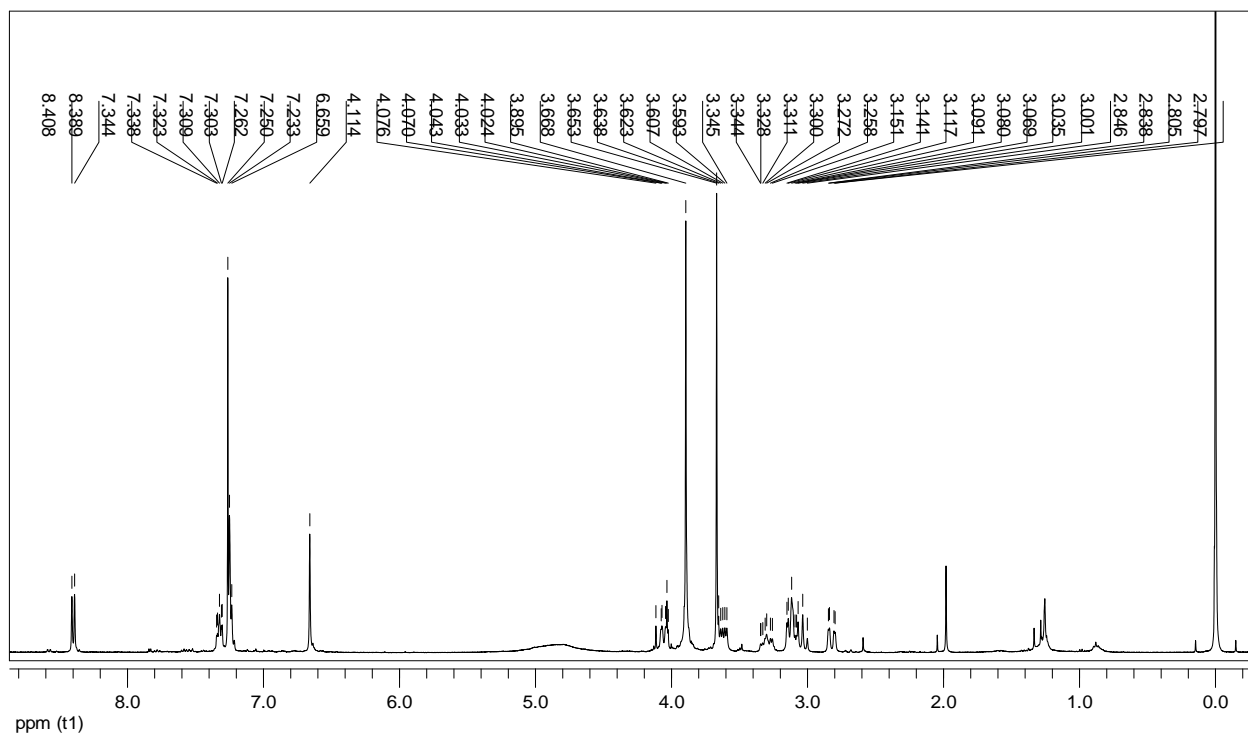

**Figure S4.** <sup>1</sup>H-NMR spectrum of 3, (CDCl<sub>3</sub>, 400 MHz).

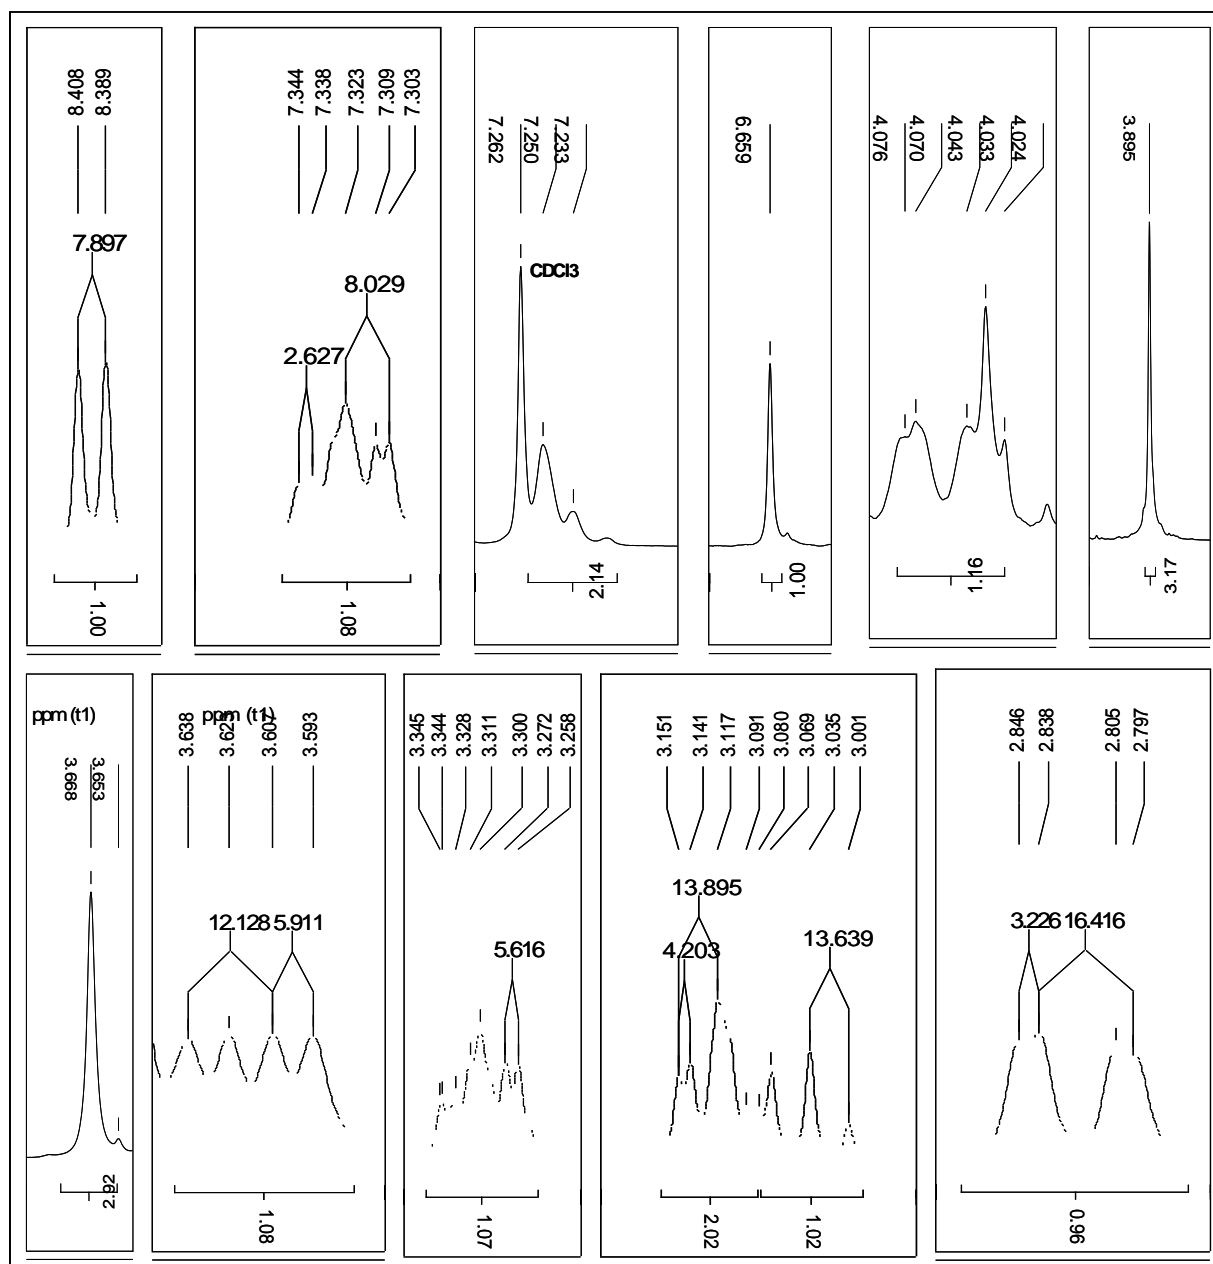

**Figure S5.**  $^1\text{H}$ -NMR spectrum (amplifications) of **3**, ( $\text{CDCl}_3$ , 400 MHz).
